# Supplementary material for: Electrocatalytic activity and surface oxide reconstruction of bimetallic iron–cobalt nanocarbide electrocatalysts for the oxygen evolution reaction
Source: Royal Society of Chemistry journal article supplement (doi:10.1039/d3ra07003d), 2023-01-01
Supplement: d3ra07003d1.pdf [file d3ra07003d1.pdf]

Supporting Information for article, “Electrocatalytic activity and surface oxide reconstruction of bimetallic iron-cobalt nanocarbide electrocatalysts for the oxygen evolution reaction”

*Amanda J. Ritz†, Isabella A. Bertini‡, Edward T. Nguyen, Geoffrey F. Strouse, Robert A. Lazenby\**

Department of Chemistry & Biochemistry, Florida State University, Tallahassee, Florida

|                                                                                                                                                     |    |
|-----------------------------------------------------------------------------------------------------------------------------------------------------|----|
| Section 1. SEM images of FeCo Prussian blue analogue (PBA) precursors. ....                                                                         | 2  |
| Section 2. Powder X-ray diffraction of PBA precursors. ....                                                                                         | 3  |
| Section 3. X-ray fluorescence elemental composition for FeCo PBA precursors and FeCo carbides. ....                                                 | 4  |
| Section 4. Powder X-ray diffraction and fits for $Fe_xCo_{1-x}C_y$ composition range. ....                                                          | 5  |
| Section 5. Powder XRD 15% Fe FeCo post OER cycling. ....                                                                                            | 7  |
| Section 6. Powder XRD of Fe, Co and 15% Fe FeCo oxides. ....                                                                                        | 8  |
| Section 7. SEM micrograph of drop casted nanomaterial modified glassy carbon surface. ....                                                          | 9  |
| Section 8. Representative double-layer capacitance measurements for determining electrochemically active surface area for an FeCo nanocarbide. .... | 10 |
| Section 9. OER polarization curves with iR compensation. ....                                                                                       | 11 |
| Section 10. Additional voltammetry data on FeCo nanocarbitides. ....                                                                                | 11 |
| Section 11. Overpotential comparisons of bimetallic OER catalysts from literature. ....                                                             | 13 |
| Section 12. XPS chemical shifts, and calculation of oxide percentage for select $Fe_xCo_{1-x}C_y$ samples. ....                                     | 14 |
| Section 13. Determination of surface layer thickness. ....                                                                                          | 16 |
| Section 14. Electrochemical stability of commercial RuO <sub>2</sub> nanoparticles. ....                                                            | 17 |
| Section 15. Additional stability measurements of FeCo nanocarbitides. ....                                                                          | 17 |
| Section 16. Linear sweep voltammograms (LSVs) of PBA-derived 15% Fe containing FeCo oxide. ....                                                     | 18 |
| References .....                                                                                                                                    | 19 |

**Section 1. SEM images of FeCo Prussian blue analogue (PBA) precursors.**

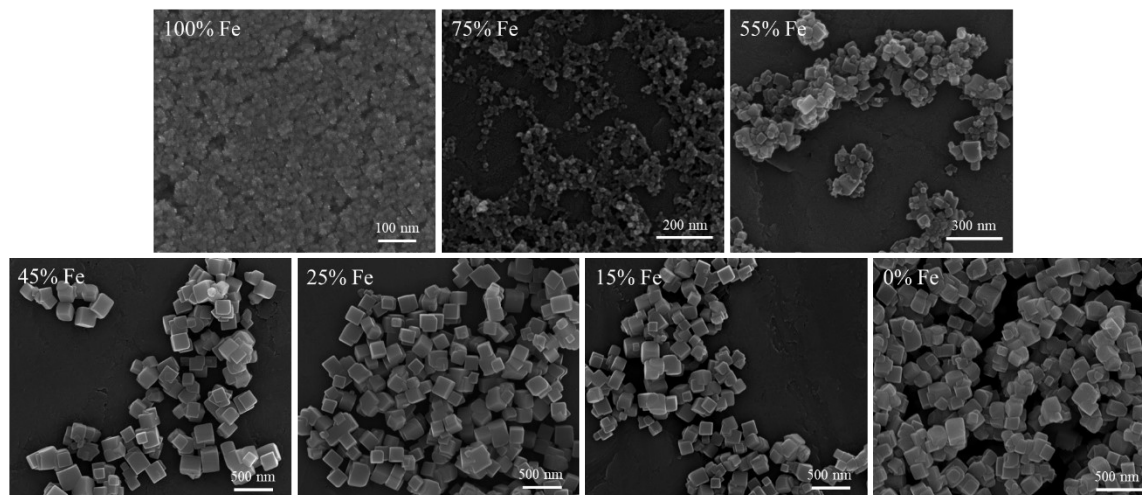

**Figure S1.** Scanning electron microscopy (SEM) images of FeCo Prussian blue analogue (PBA) precursors with increasing % Fe. Sizes range from < 20 nm – 150 nm.

## Section 2. Powder X-ray diffraction of PBA precursors.

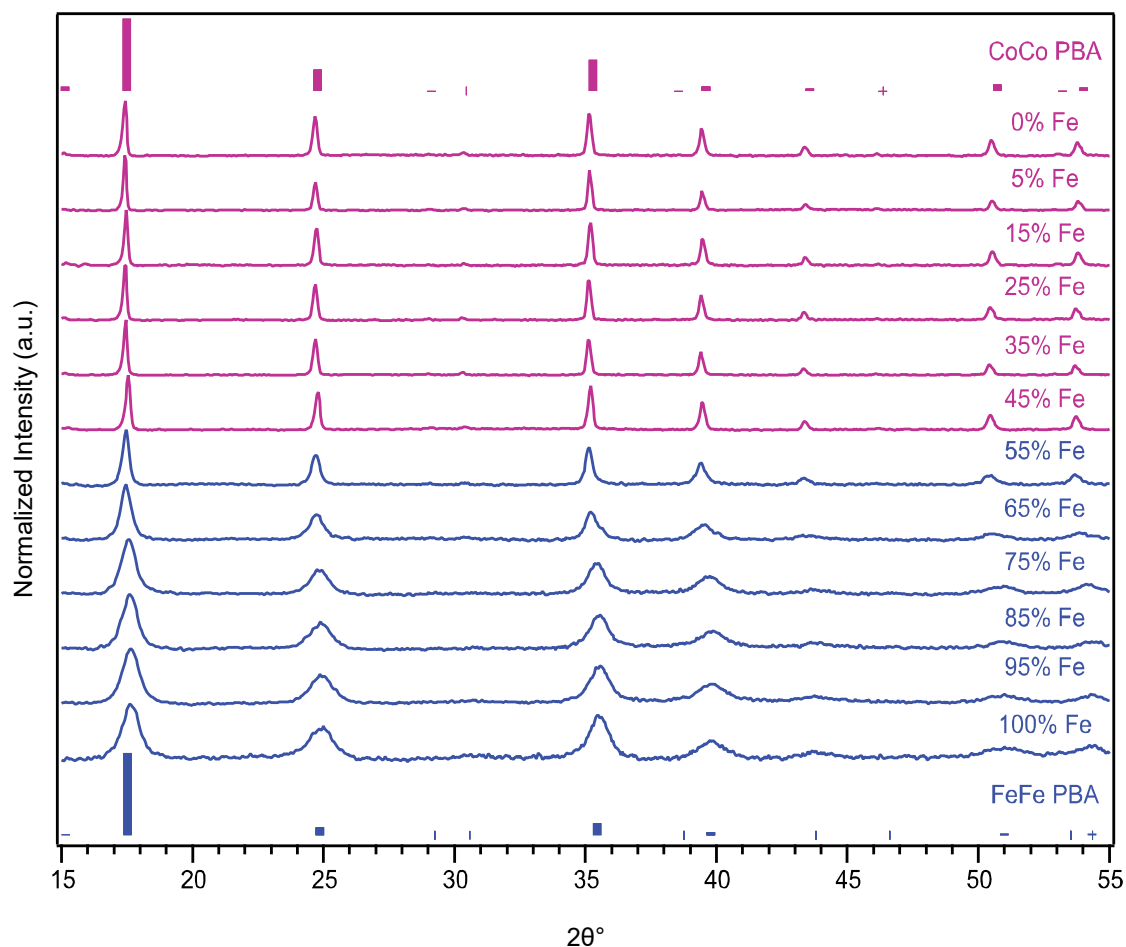

**Figure S2.** Powder X-ray diffraction patterns of FeCo PBA precursors. A transition from the  $\text{KCoCo}(\text{CN})_6 \cdot x \text{H}_2\text{O}$  PBA type to the  $\text{KFeFe}(\text{CN})_6 \cdot x \text{H}_2\text{O}$  is observed as the amount of Fe increases, corresponding to a Vegard shift towards lower  $2\theta$  and the space group of Fm-3m remains for both PBA forms. The pink reference card (ICSD 45154) represents the  $\text{KCoCo}(\text{CN})_6 \cdot x \text{H}_2\text{O}$  type and the blue reference card (ICSD 23102) represents the  $\text{KFeFe}(\text{CN})_6 \cdot x \text{H}_2\text{O}$  type.

**Section 3. X-ray fluorescence elemental composition for FeCo PBA precursors and FeCo carbides.**

**Table S1.** X-ray fluorescence (XRF) elemental composition for FeCo PBA precursors and FeCo carbides. Results show ratio of metals are maintained from precursor to resultant carbide.

| Sample<br>(PBA Precursors) | % Fe | % Co |
|----------------------------|------|------|
| 100% Fe                    | 99   | 1    |
| 95% Fe                     | 93   | 7    |
| 85% Fe                     | 95   | 5    |
| 75% Fe                     | 84   | 16   |
| 65% Fe                     | 72   | 28   |
| 55% Fe                     | 60   | 40   |
| 45% Fe                     | 33   | 67   |
| 35% Fe                     | 26   | 74   |
| 25% Fe                     | 18   | 82   |
| 20% Fe                     | 14   | 86   |
| 15% Fe                     | 12   | 88   |
| 5% Fe                      | 7    | 93   |
| 0% Fe                      | 0    | 100  |

| Sample<br>(FeCo Carbide) | % Fe | % Co |
|--------------------------|------|------|
| 100% Fe                  | 100  | 0    |
| 95% Fe                   | 93   | 7    |
| 85% Fe                   | 95   | 5    |
| 75% Fe                   | 80   | 20   |
| 65% Fe                   | 71   | 29   |
| 55% Fe                   | 60   | 40   |
| 45% Fe                   | 35   | 65   |
| 35% Fe                   | 27   | 73   |
| 25% Fe                   | 20   | 80   |
| 20% Fe                   | 14   | 86   |
| 15% Fe                   | 12   | 88   |
| 5% Fe                    | 4    | 96   |
| 0% Fe                    | 0    | 100  |

#### Section 4. Powder X-ray diffraction and fits for $\text{Fe}_x\text{Co}_{1-x}\text{C}_y$ composition range.

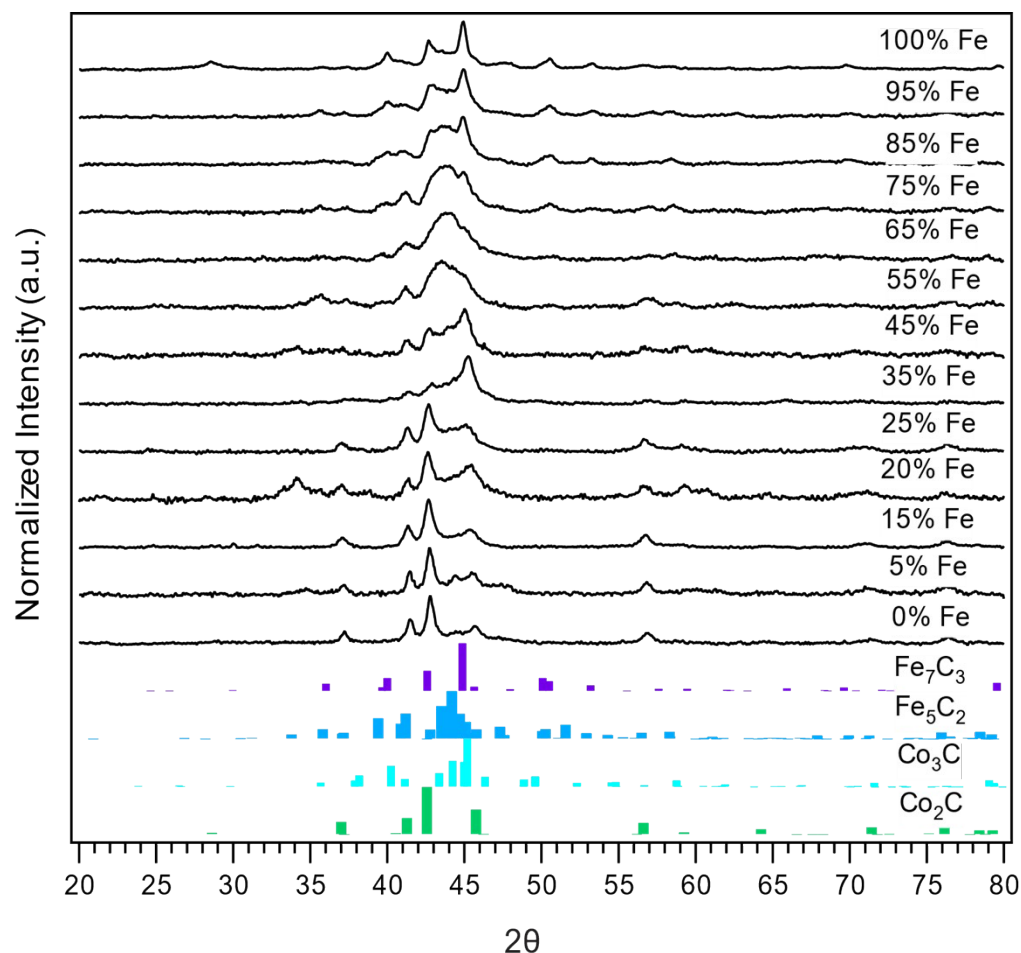

**Figure S3.** Powder X-ray diffraction (pXRD) patterns of all  $\text{Fe}_x\text{Co}_{1-x}\text{C}_y$  samples produced for electrocatalytic study, of varying Fe content from 0 – 100%. Pure reference phases are shown for comparison, for  $\text{M}_2\text{C}$  (Green reference, COD: 1528415),  $\text{M}_3\text{C}$  (light blue reference, ICSD: 43521),  $\text{M}_5\text{C}_2$  (dark blue reference, ICSD: 423885) and  $\text{M}_7\text{C}_3$  (purple reference, ICSD: 76830).

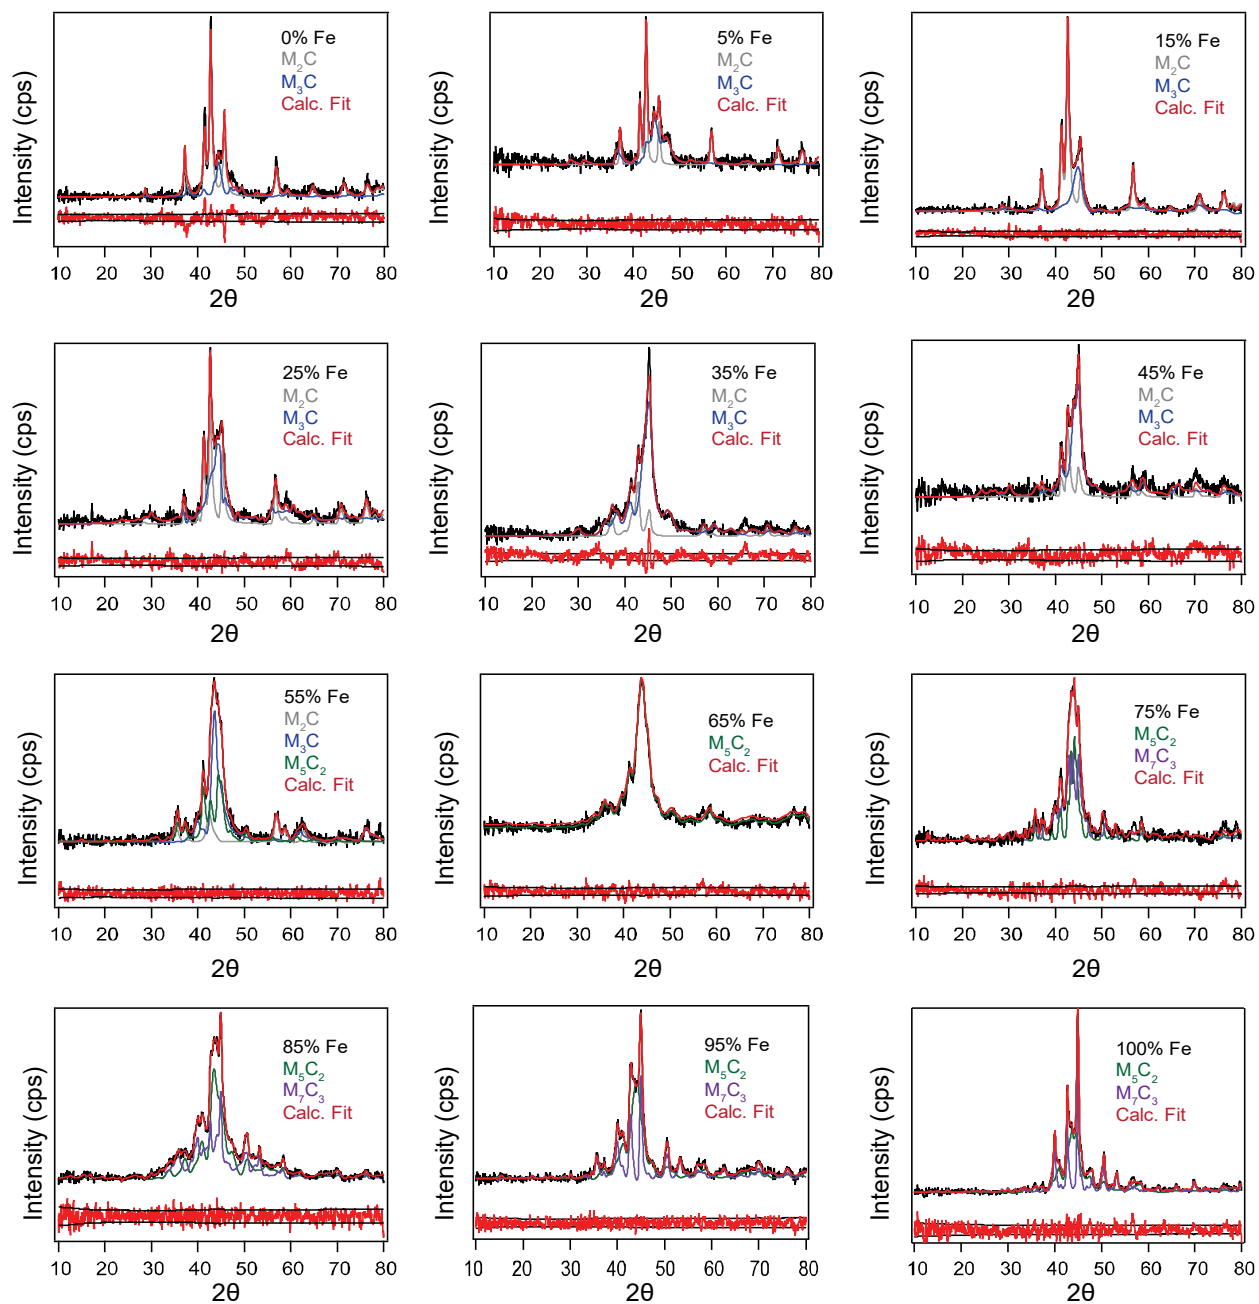

**Figure S4.** Contribution of varying phases fitted (upper red) to each  $\text{Fe}_x\text{Co}_{1-x}\text{C}_y$  powder XRD pattern. Residuals are plotted below each fit (lower red).

Section 5. Powder XRD 15% Fe FeCo post OER cycling.

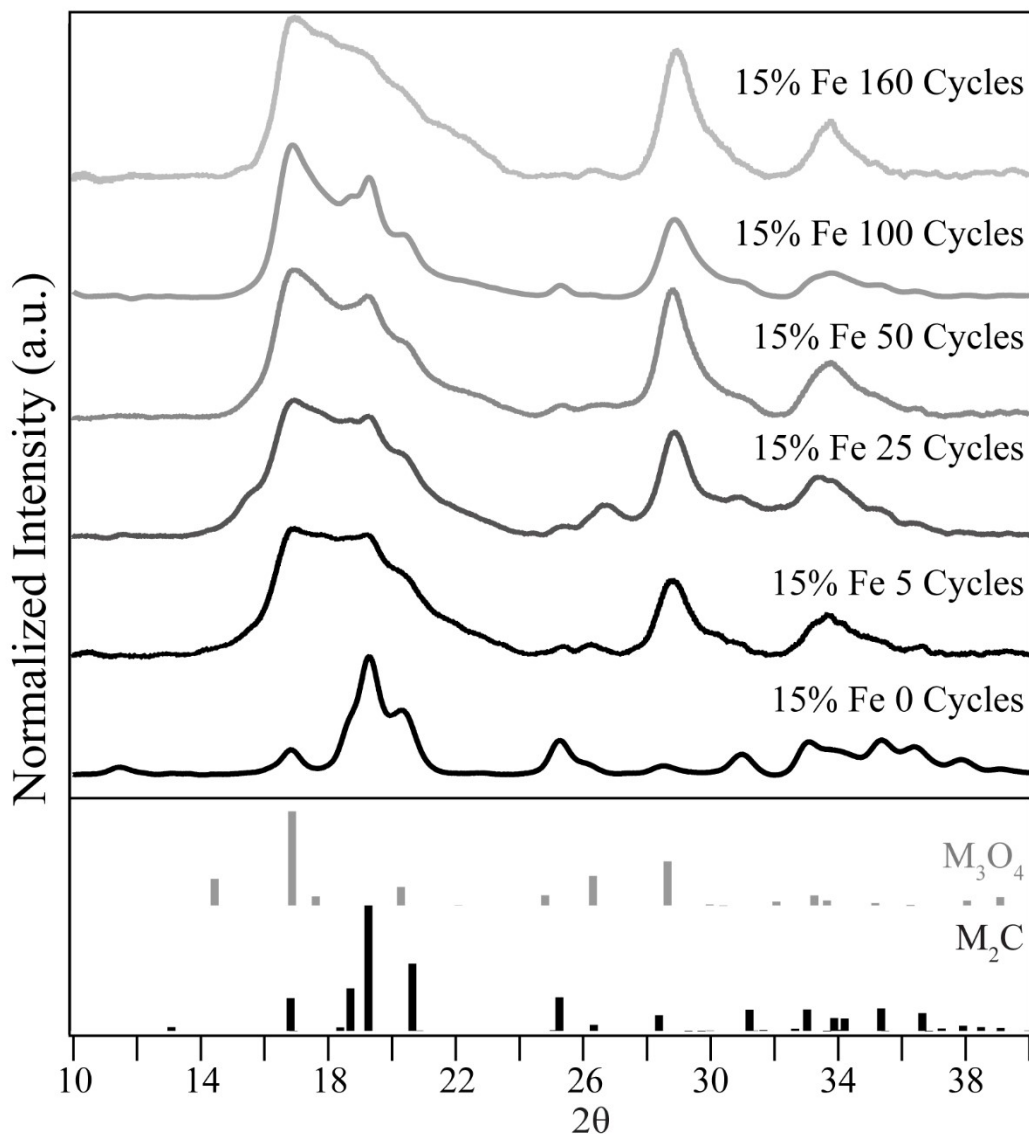

**Figure S5.** Powder X-ray diffraction of the 15% Fe sample, post OER cycling study. pXRD reference cards shown below, in grey  $M_3O_4$  ( $Fe_2CoO_4$  structure) and in black  $M_2C$  ( $Co_2C$  structure). The intensities of the  $M_2C$  peaks,  $I_{M_2C}$ , are normalized to 1 in each spectrum. The percentage of  $M_3O_4$  in the sample was estimated using the relative intensities of the most prominent pXRD peak for  $M_3O_4$  (16.88° 2θ) and  $M_2C$  (19.26° 2θ) using:

$$\% M_3O_4 = (I_{M_3O_4} / (I_{M_3O_4} + I_{M_2C})) \times 100$$

## Section 6. Powder XRD of Fe, Co and 15% Fe FeCo oxides.

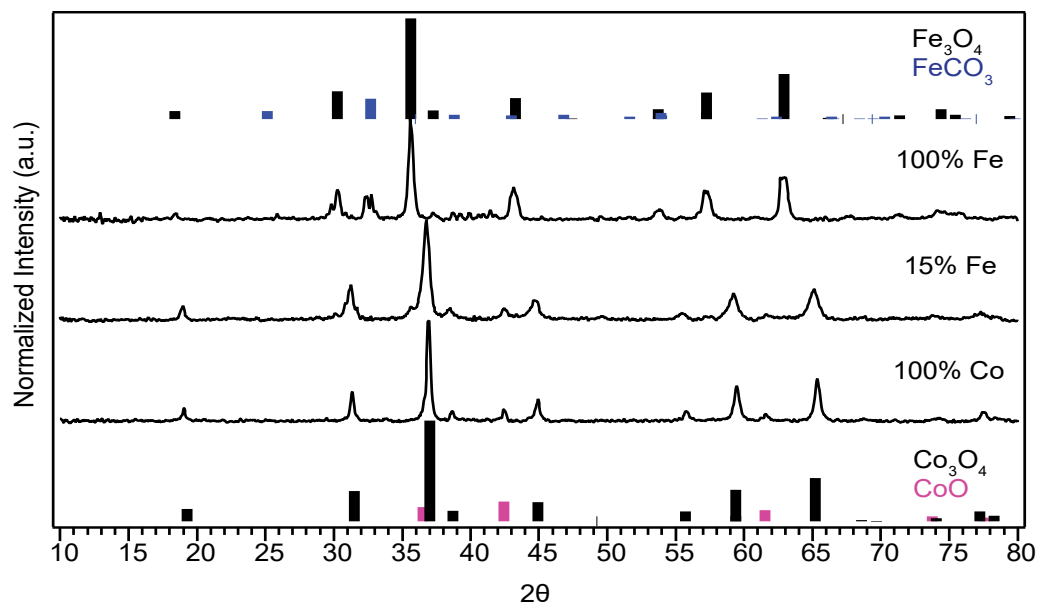

**Figure S6.** Powder XRD patterns of FeCo oxides, for 0% Fe (i.e. 100% Co), 15% Fe and 100% Fe. Pure phase references are shown for comparison for Co<sub>3</sub>O<sub>4</sub> (bottom black, reference ICSD 24210), CoO (bottom pink, reference ICSD 174027), Fe<sub>3</sub>O<sub>4</sub> (top blue, reference ICSD 75627) and FeCO<sub>3</sub> (top black, reference COD 9014728).



**Section 7. SEM micrograph of drop casted nanomaterial modified glassy carbon surface.**

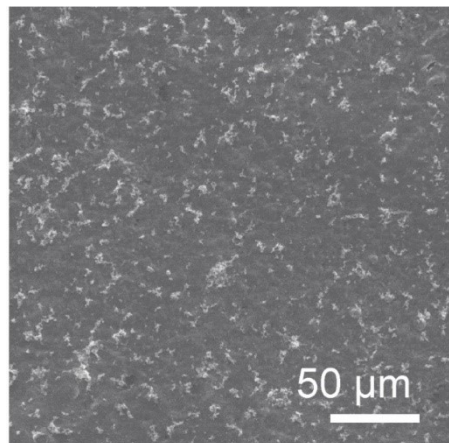

**Figure S7.** SEM micrograph of a homogeneously drop casted FeCo nanocarbide, containing 55% Fe, on a glassy carbon wafer electrode.

**Section 8. Representative double-layer capacitance measurements for determining electrochemically active surface area for an FeCo nanocarbide.**

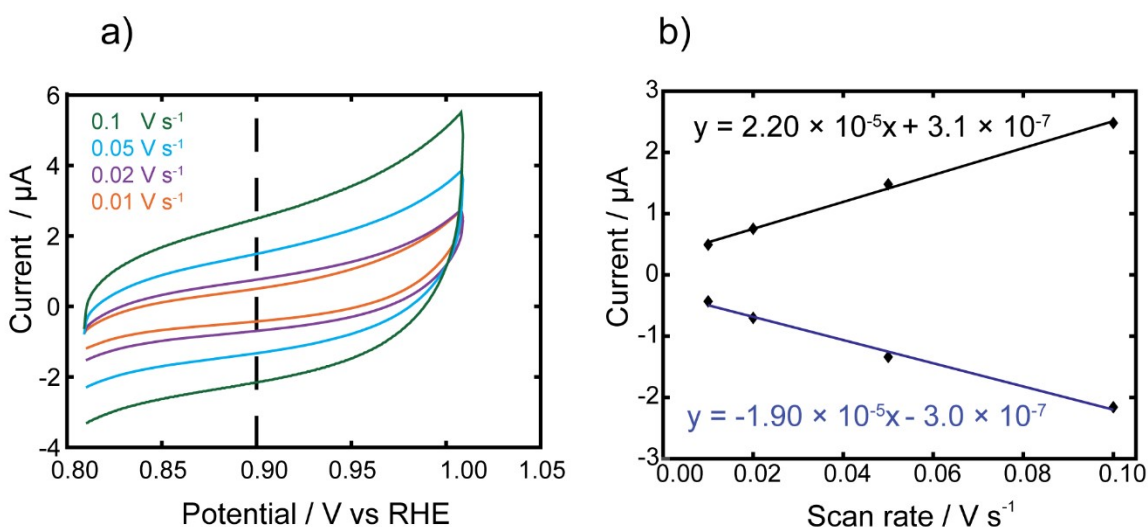

**Figure S8.** Representative double-layer capacitance measurements for determining electrochemically active surface area for a 45% Fe containing FeCo nanocarbide. a) Cyclic voltammograms (CVs) were measured in a non-Faradaic current region, using scan rates of 0.01, 0.02, 0.05, and 0.10  $\text{V s}^{-1}$ . The cathodic and anodic charging currents were both measured at a fixed potential of 0.9 V vs. RHE (shown by dashed line), and are shown as a plot of current vs. scan rate in b) with the resulting slopes representing the double layer capacitance used to calculate electrochemical surface area.

## Section 9. OER polarization curves with iR compensation.

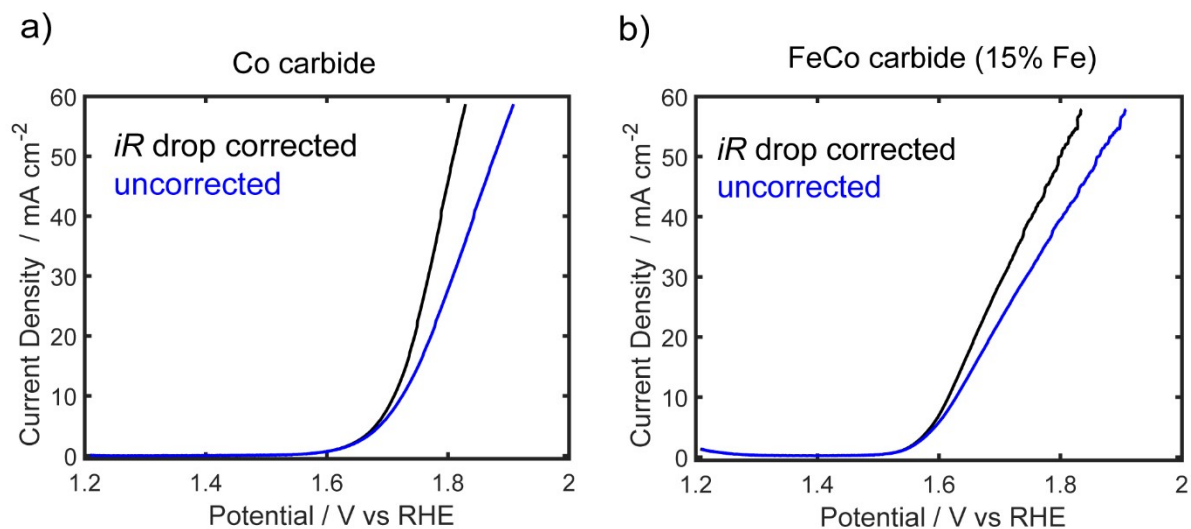

**Figure S9.** OER polarization curves of iR drop corrected (black) and uncorrected (blue) curves for a) Co carbide and b) FeCo carbide (15% Fe).

## Section 10. Additional voltammetry data on FeCo nanocarbitides.

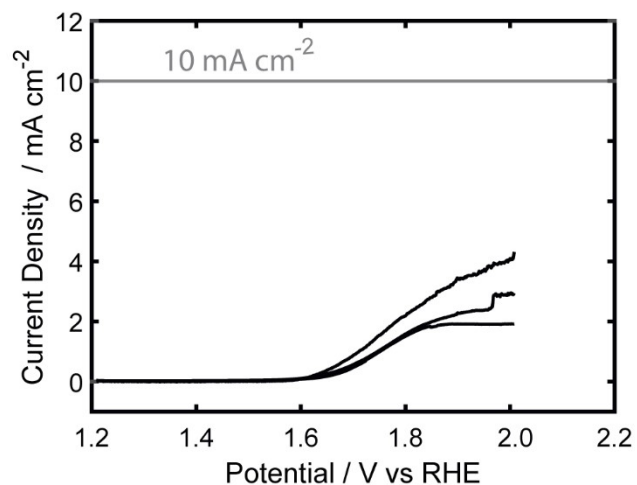

**Figure S10.** Three linear sweep voltammograms of monometallic Fe carbide samples drop cast on glassy carbon electrodes in 1 M KOH. Samples did not achieve a current density of 10 mA cm<sup>-2</sup>.

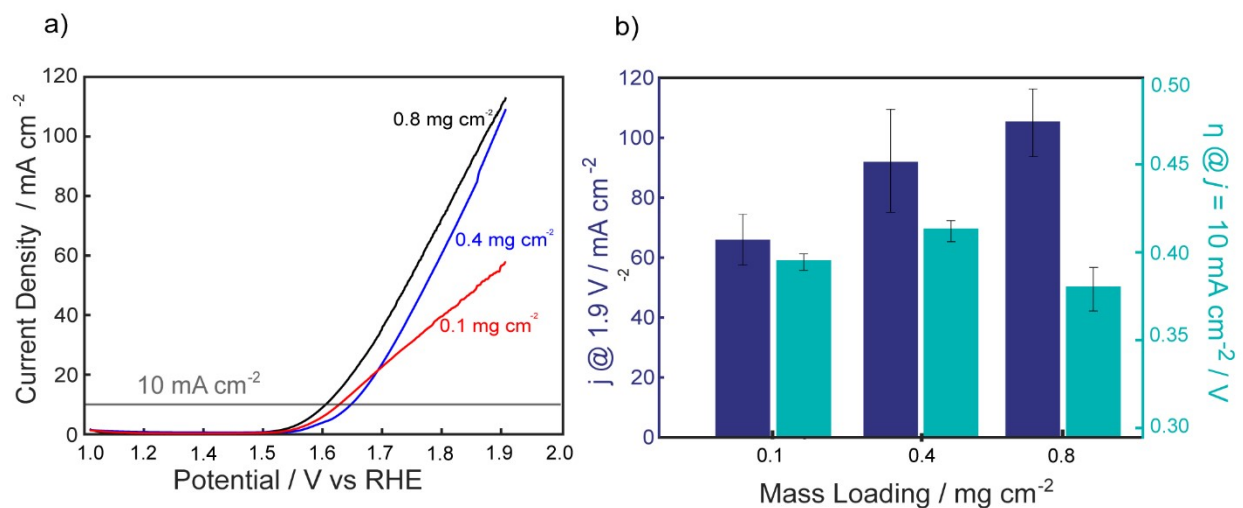

**Figure S11.** a) Linear sweep voltammograms in 1 M KOH were collected of FeCo nanocarbide (15% Fe) drop cast on a glassy carbon electrode at varying mass loadings of 0.1 mg cm<sup>-2</sup> (red), of 0.4 mg cm<sup>-2</sup> (blue), and 0.8 mg cm<sup>-2</sup> (black). Current densities extracted at 1.9 V and overpotentials extracted at a current density of 10 mA cm<sup>-2</sup> were plotted as a bar graph in b) at varying mass loadings.

## Section 11. Overpotential comparisons of bimetallic OER catalysts from literature.

**Table S-2.** Overpotential comparisons of bimetallic FeNi, FeCo, and other bimetallic catalyst systems in alkaline conditions for OER electrocatalytic activity.

| Electrocatalyst                                     | Optimum ratio (X:X) | Support / substrate | Mass loading / mg cm <sup>-2</sup> | $\eta_{geo}@$ 10 mA cm <sup>-2</sup> / V | Reference        |
|-----------------------------------------------------|---------------------|---------------------|------------------------------------|------------------------------------------|------------------|
| <b>Noble metal</b>                                  |                     |                     |                                    |                                          |                  |
| <b>RuO<sub>2</sub></b>                              | <b>--</b>           | <b>GCE</b>          | <b>0.10</b>                        | <b>0.36</b>                              | <b>This work</b> |
| RuO <sub>2</sub>                                    | --                  | GCE                 | Sputtered                          | 0.38                                     | 1                |
| IrO <sub>2</sub>                                    | --                  | GCE                 | Sputtered                          | 0.38                                     | 1                |
| <b>FeCo</b>                                         |                     |                     |                                    |                                          |                  |
| <b>Fe<sub>x</sub>Co<sub>1-x</sub>C<sub>y</sub></b>  | <b>20:80</b>        | <b>GCE</b>          | <b>0.10</b>                        | <b>0.40</b>                              | <b>This work</b> |
| (Co <sub>x</sub> Fe <sub>1-x</sub> ) <sub>2</sub> P | 1:1                 | GCE                 | --                                 | 0.37                                     | 2                |
| FeCoOOH/ NS                                         | 1:1                 | NF                  | --                                 | 0.21                                     | 3                |
| FeCo/C NS                                           | 1:1                 | NF                  | --                                 | 0.22                                     | 4                |
| $\alpha$ -CoFe(OH) <sub>2</sub>                     | 4:1                 | Ti                  | 0.28                               | 0.30                                     | 5                |
| Spinel Co <sub>4</sub> FeO                          | 4:1                 | Ti                  | 0.28                               | 0.40                                     | 5                |
| FeCo-LDH NS                                         | 1:1                 | GCE                 | 0.70                               | 0.28                                     | 6                |
| <b>FeNi</b>                                         |                     |                     |                                    |                                          |                  |
| Fe <sub>x</sub> Ni <sub>1-x</sub> O                 | 10:90               | Au                  | -- / A = 0.196 cm <sup>2</sup>     | 0.28                                     | 7                |
| NiFeOOH                                             | 65:35               | Graphene            | -- / A = 0.025 cm <sup>2</sup>     | 0.32                                     | 8                |
| NiFe(OH) <sub>2</sub>                               | 4:1                 | Au                  | 0.14                               | 0.26                                     | 9                |
| NiFeO <sub>x</sub>                                  | 9:1                 | Au/Ti               | --                                 | 0.34                                     | 10               |
| NiFe(OH) <sub>2</sub>                               | 2:1                 | Graphene (oxide)    | 0.25                               | 0.23                                     | 11               |
| NiFeO <sub>x</sub> /C                               | 69:31               | GCE                 | --                                 | 0.28                                     | 12               |
| <b>Other bimetallic systems</b>                     |                     |                     |                                    |                                          |                  |
| Co <sub>6</sub> Mo <sub>6</sub> C <sub>2</sub>      | --                  | NCRGO               | 0.14                               | 0.26                                     | 13               |
| Mo <sub>6</sub> Ni <sub>6</sub> C                   | --                  | NF                  | 9.8                                | 0.19                                     | 14               |
| Co <sub>6</sub> W <sub>6</sub> C                    | --                  | CC                  | 7 – 10                             | 0.29                                     | 15               |
| Fe: Ni <sub>3</sub> C                               | 2:98                | GCE                 | 0.15                               | 0.28                                     | 16               |
| Co: Ni <sub>3</sub> C                               | 1:1                 | Ni@C                | 0.20                               | 0.22                                     | 17               |
| Fe <sub>3</sub> Mo <sub>3</sub> C                   | --                  | GCE                 | 0.25                               | ~0.67                                    | 18               |
| Fe/Co:NC                                            | 1:1                 | GCE                 | 0.30                               | 1.6                                      | 19               |

GCE = Glassy carbon electrode, Au = gold, IF = Iron foam, NF = Nickel foam, NS = nanosheet, LDH = layered double hydroxides, A = electrochemically active area, RF = roughness factor, NCRGO = N-doped reduced graphene oxide.

**Section 12. XPS chemical shifts, and calculation of oxide percentage for select  $\text{Fe}_x\text{Co}_{1-x}\text{C}_y$  samples.**

**Table S3.** Table of all XPS chemical shifts for selected  $\text{Fe}_x\text{Co}_{1-x}\text{C}_y$  samples. All chemical shifts were calibrated to  $\text{C}1s = 284.8$  eV. No clear trend is correlative to experimental electrocatalysis results, and minimal changes are seen in the overall

| Sample  | Co Chemical Shifts (eV)                                                         | Fe Chemical Shifts (eV)                                                         | C Chemical Shifts (eV)                 | O Chemical Shifts (eV)                   |
|---------|---------------------------------------------------------------------------------|---------------------------------------------------------------------------------|----------------------------------------|------------------------------------------|
| 0% Fe   | Co <sup>0</sup> : 778.5<br>Co <sup>2+</sup> : 782.3<br>Co <sup>3+</sup> : 780.0 | N/A                                                                             | C-M: 284.8<br>C-C: 285.8<br>C-O: 287.6 | O-Fe: 530.3<br>O-Co: 531.6<br>O-C: 532.7 |
| 15% Fe  | Co <sup>0</sup> : 778.3<br>Co <sup>2+</sup> : 782.7<br>Co <sup>3+</sup> : 780.3 | Fe <sup>0</sup> : 707.0<br>Fe <sup>2+</sup> : 709.3<br>Fe <sup>3+</sup> : 711.3 | M-C: 284.8<br>C-C: 286.6<br>C-O: 288.9 | O-Fe: 530.1<br>O-Co: 531.8<br>O-C: 532.7 |
| 25% Fe  | Co <sup>0</sup> : 778.2<br>Co <sup>2+</sup> : 781.4<br>Co <sup>3+</sup> : 779.1 | Fe <sup>0</sup> : 707.5<br>Fe <sup>2+</sup> : 709.9<br>Fe <sup>3+</sup> : 711.8 | M-C: 284.8<br>C-C: 286.1<br>C-O: 288.2 | O-Fe: 530.4<br>O-Co: 532.1<br>O-C: 535.2 |
| 45% Fe  | Co <sup>0</sup> : 777.9<br>Co <sup>2+</sup> : 781.8<br>Co <sup>3+</sup> : 779.5 | Fe <sup>0</sup> : 706.7<br>Fe <sup>2+</sup> : 708.8<br>Fe <sup>3+</sup> : 710.7 | M-C: 284.8<br>C-C: 284.9<br>C-O: 287.2 | O-Fe: 529.9<br>O-Co: 531.6<br>O-C: 533.2 |
| 55% Fe  | Co <sup>0</sup> : 778.3<br>Co <sup>2+</sup> : 783.3<br>Co <sup>3+</sup> : 780.1 | Fe <sup>0</sup> : 707.1<br>Fe <sup>2+</sup> : 709.3<br>Fe <sup>3+</sup> : 711.2 | M-C: 284.8<br>C-C: 286.5<br>C-O: 288.5 | O-Fe: 530.3<br>O-Co: 532.0<br>O-C: 533.4 |
| 75% Fe  | Co <sup>0</sup> : 778.6<br>Co <sup>2+</sup> : 786.0<br>Co <sup>3+</sup> : 782.3 | Fe <sup>0</sup> : 707.1<br>Fe <sup>2+</sup> : 709.3<br>Fe <sup>3+</sup> : 711.2 | M-C: 284.8<br>C-C: 286.6<br>C-O: 288.7 | O-Fe: 530.3<br>O-Co: 532.0<br>O-C: 533.4 |
| 100% Fe | ---                                                                             | Fe <sup>0</sup> : 707.3<br>Fe <sup>2+</sup> : 709.5<br>Fe <sup>3+</sup> : 711.2 | M-C: 284.8<br>C-C: 285.3<br>C-O: 287.3 | O-Fe: 530.4<br>O-Co: 532.1<br>O-C: 533.6 |

electronic environment.

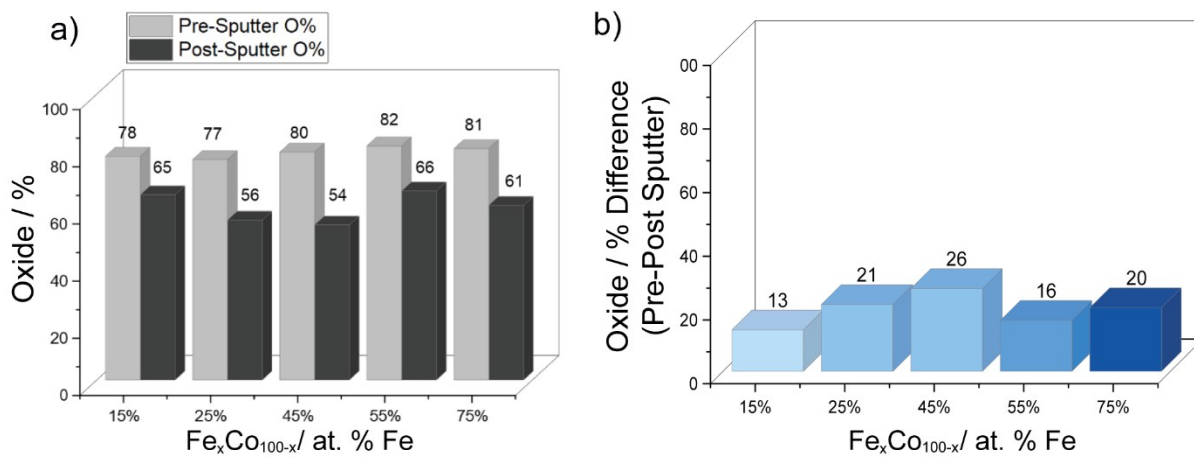

**Figure S12.** a) XPS quantification of oxide present in as synthesized  $\text{Fe}_x\text{Co}_{1-x}\text{C}_y$  samples before (light gray) and after (dark gray) Ar ion sputtering at 5 keV/1  $\mu\text{A}$  for 15 minutes. Note that carbon atomic percentages were not included as samples were run on a carbon puck, therefore the relative amount of only metal and oxygen can be accurately observed. b) Percent difference of oxide in various  $\text{Fe}_x\text{Co}_{1-x}\text{C}_y$  samples. Interestingly, 15% shows the smallest oxide percent difference suggesting that minor oxide surface layers may enhance electrocatalysis.

### Section 13. Determination of surface layer thickness.

To determine surface layer thickness, first, the volume,  $V$ , of the carbide nanoparticle was calculated to be  $382 \text{ nm}^3$  for a  $9 \text{ nm}$  (diameter) particle using

$$V = \frac{4}{3}\pi r^3 \quad (1)$$

where  $r$  is the radius of the nanoparticles. Then, the surface area,  $SA$ , of the particle was calculated to be  $254 \text{ nm}^2$  using

$$SA = 4\pi r^2 \quad (2)$$

Therefore, the surface area to volume ratio of the nanoparticle is 67% using

$$SA \text{ to } V \text{ ratio in percent form} = \frac{SA}{V} \times 100 \quad (3)$$

Assuming 67% of the total volume or  $254 \text{ nm}^3$  constitutes the surface layer, an estimation of the particle's core volume was calculated as  $128 \text{ nm}^3$  by taking 33% of the total particle volume. The radius of the core,  $r_c$ , is then  $3.11 \text{ nm}$ , using

$$r_c = \sqrt[3]{\frac{128 \times 3}{4\pi}} \quad (4)$$

The difference of the total radius of the particle,  $r_T$ , and the radius of the core,  $r_c$ , is equal to the thickness of the surface layer,  $t$ , which equals  $13.9 \text{ \AA}$  using

$$t = r_T - r_c \quad (5)$$

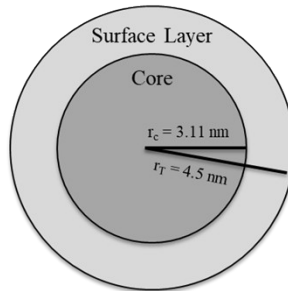

The material after 160 OER CV cycles contained up to 85% total oxide present in the surface layer. This was calculated as shown below:



$$\text{total oxide in surface layer} = \frac{57 \text{ (percent of total oxide in particle)}}{67 \text{ (percent of surface layer volume)}} \times 100 \quad (6)$$

## Section 14. Electrochemical stability of commercial RuO<sub>2</sub> nanoparticles.

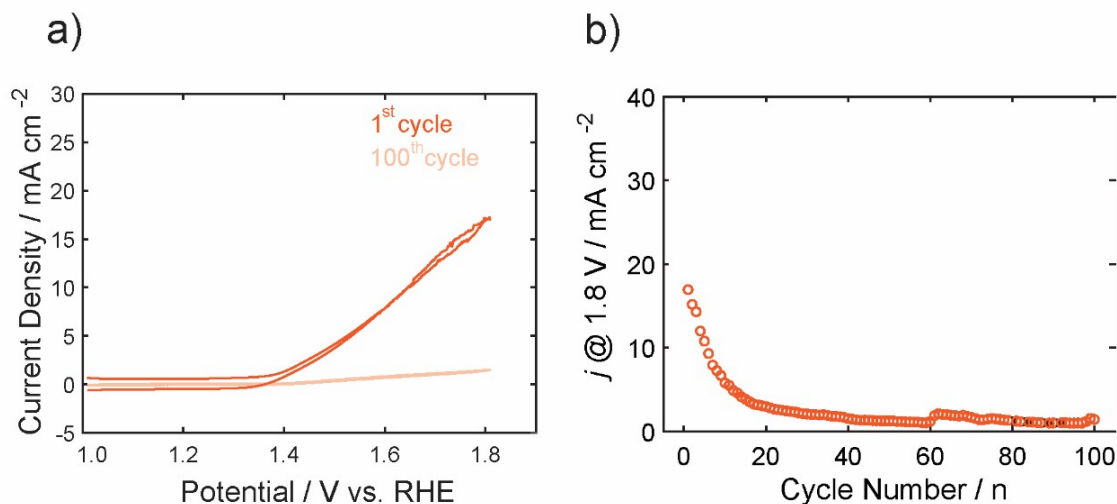

**Figure S13.** a) CVs of the 1<sup>st</sup> and 100<sup>th</sup> cycle of RuO<sub>2</sub> at a scan rate of 5 mV s<sup>-1</sup>, and b) the decay of current density at a maximum potential of 1.8 V vs. RHE over the 100 CV cycles.

## Section 15. Additional stability measurements of FeCo nanocarbides.

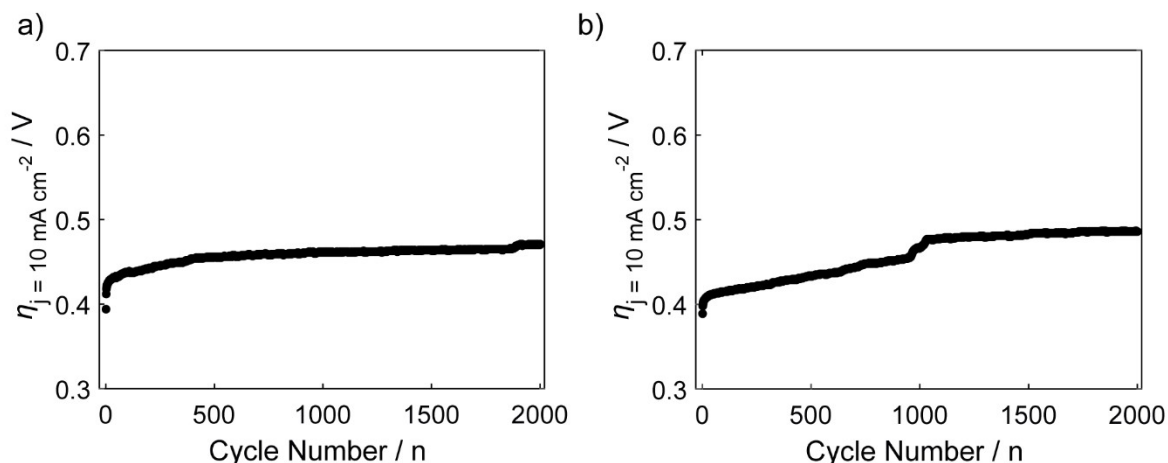

**Figure S14.** Stability measurement of FeCo nanocarbide (15% Fe) with overpotentials extracted from a current density of 10 mA cm<sup>-2</sup>, collected at a scan rate of 50 mV s<sup>-1</sup> in 1 M KOH with a) representing the first measurement and b) the second measurement collected.

**Section 16. Linear sweep voltammograms (LSVs) of PBA-derived 15% Fe containing FeCo oxide.**

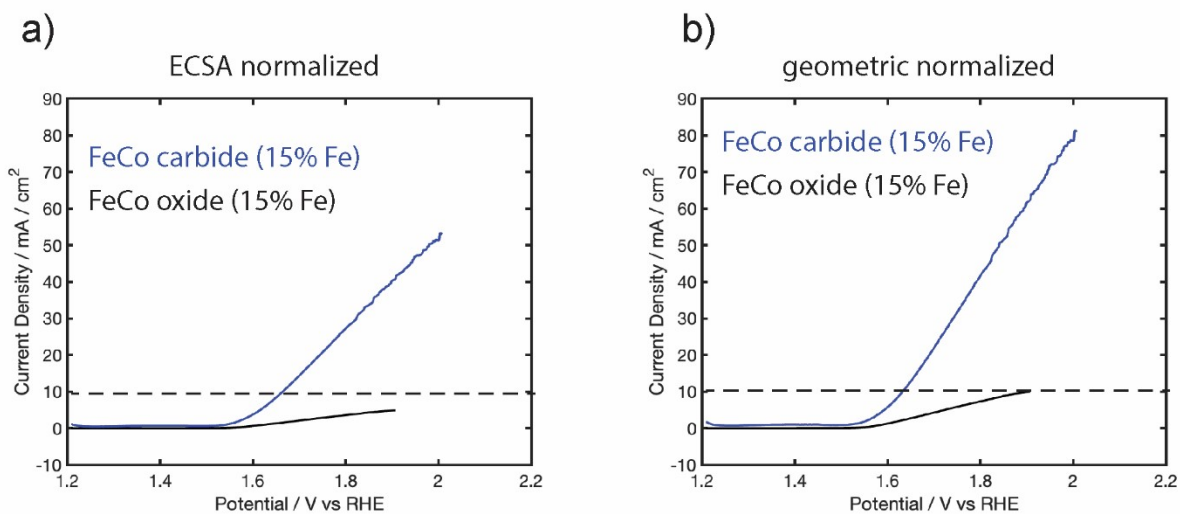

**Figure S15.** Linear sweep voltammograms (LSVs) of PBA-derived FeCo oxide (15% Fe), compared to FeCo nanocarbide (15% Fe) with a) ECSA normalized and b) geometric normalized current densities.

## References

- (1) Jung, S.; McCrory, C. C. L.; Ferrer, I. M.; Peters, J. C.; Jaramillo, T. F. Benchmarking Nanoparticulate Metal Oxide Electrocatalysts for the Alkaline Water Oxidation Reaction. *J. Mater. Chem. A* **2016**, *4* (8), 3068–3076. <https://doi.org/10.1039/c5ta07586f>.
- (2) Mendoza-Garcia, A.; Su, D.; Sun, S. Sea Urchin-like Cobalt-Iron Phosphide as an Active Catalyst for Oxygen Evolution Reaction. *Nanoscale* **2016**, *8* (6), 3244–3247. <https://doi.org/10.1039/c5nr08763e>.
- (3) Nguyen, T. T. H.; Lee, J.; Bae, J.; Lim, B. Binary FeCo Oxyhydroxide Nanosheets as Highly Efficient Bifunctional Electrocatalysts for Overall Water Splitting. *Chem. - A Eur. J.* **2018**, *24* (18), 4724–4728. <https://doi.org/10.1002/chem.201800022>.
- (4) Xiang, R.; Duan, Y.; Tong, C.; Peng, L.; Wang, J.; Shah, S. S. A.; Najam, T.; Huang, X.; Wei, Z. Self-Standing FeCo Prussian Blue Analogue Derived FeCo/C and FeCoP/C Nanosheet Arrays for Cost-Effective Electrocatalytic Water Splitting. *Electrochim. Acta* **2019**, *302*, 45–55. <https://doi.org/10.1016/j.electacta.2019.01.170>.
- (5) Jin, H.; Mao, S.; Zhan, G.; Xu, F.; Bao, X.; Wang, Y. Fe Incorporated  $\alpha$ -Co(OH)<sub>2</sub> Nanosheets with Remarkably Improved Activity towards the Oxygen Evolution Reaction. *J. Mater. Chem. A* **2017**, *5* (3), 1078–1084. <https://doi.org/10.1039/c6ta09959a>.

- (6) Qiao, X.; Kang, H.; Wu, J.; Li, Y.; Wang, Q.; Jia, X.; Qiao, Y.; Lu, S.; Wu, X.; Qin, W. A Partial Sulfidation Approach That Significantly Enhance the Activity of FeCo Layered Double Hydroxide for Oxygen Evolution Reaction. *Int. J. Hydrogen Energy* **2019**, *44* (60), 31987–31994. <https://doi.org/10.1016/j.ijhydene.2019.10.082>.
- (7) Mu, A.; Scheu, C.; Pokharel, A.; Bo, S.; Bein, T.; Fattakhova-rohlfing, D. Iron-Doped Nickel Oxide Nanocrystals Alkaline Water Splitting. *ACS Nano* **2015**, *9* (5), 5180–5188.
- (8) Görlin, M.; Halldin Stenlid, J.; Koroidov, S.; Wang, H. Y.; Börner, M.; Shipilin, M.; Kalinko, A.; Murzin, V.; Safonova, O. V.; Nachttegaal, M.; Uheida, A.; Dutta, J.; Bauer, M.; Nilsson, A.; Diaz-Morales, O. Key Activity Descriptors of Nickel-Iron Oxygen Evolution Electrocatalysts in the Presence of Alkali Metal Cations. *Nat. Commun.* **2020**, *11* (1), 1–11. <https://doi.org/10.1038/s41467-020-19729-2>.
- (9) Yu, X.; Zhang, M.; Yuan, W.; Shi, G. A High-Performance Three-Dimensional Ni-Fe Layered Double Hydroxide/Graphene Electrode for Water Oxidation. *J. Mater. Chem. A* **2015**, *3* (13), 6921–6928. <https://doi.org/10.1039/c5ta01034a>.
- (10) Trotochaud, L.; Ranney, J. K.; Williams, K. N.; Boettcher, S. W. Solution-Cast Metal Oxide Thin Film Electrocatalysts for Oxygen Evolution. *J. Am. Chem. Soc.* **2012**, *134* (41), 17253–17261. <https://doi.org/10.1021/ja307507a>.
- (11) Ma, W.; Ma, R.; Wang, C.; Liang, J.; Liu, X.; Zhou, K.; Sasaki, T. A Superlattice of

- Alternately Stacked Ni-Fe Hydroxide Nanosheets and Graphene for Efficient Splitting of Water. *ACS Nano* **2015**, *9* (2), 1977–1984.  
<https://doi.org/10.1021/nn5069836>.
- (12) Qiu, Y.; Xin, L.; Li, W. Electrocatalytic Oxygen Evolution over Supported Small Amorphous Ni-Fe Nanoparticles in Alkaline Electrolyte. *Langmuir* **2014**, *30* (26), 7893–7901. <https://doi.org/10.1021/la501246e>.
- (13) Tang, Y. J.; Liu, C. H.; Huang, W.; Wang, X. L.; Dong, L. Z.; Li, S. L.; Lan, Y. Q. Bimetallic Carbides-Based Nanocomposite as Superior Electrocatalyst for Oxygen Evolution Reaction. *ACS Appl. Mater. Interfaces* **2017**, *9* (20), 16977–16985.  
<https://doi.org/10.1021/acsami.7b01096>.
- (14) Zu, M. Y.; Wang, C.; Zhang, L.; Zheng, L. R.; Yang, H. G. Reconstructing Bimetallic Carbide Mo<sub>6</sub>Ni<sub>6</sub>C for Carbon Interconnected MoNi Alloys to Boost Oxygen Evolution Electrocatalysis. *Mater. Horizons* **2019**, *6* (1), 115–121.  
<https://doi.org/10.1039/C8MH00664D>.
- (15) Chen, J.; Ren, B.; Cui, H.; Wang, C.; Chen, J.; Ren, B.; Cui, H.; Wang, C. Constructing Pure Phase Tungsten-Based Bimetallic Carbide Nanosheet as an Efficient Bifunctional Electrocatalyst for Overall Water Splitting. *Small* **2020**, *16* (23), 1907556. <https://doi.org/10.1002/SMLL.201907556>.
- (16) Fan, H.; Yu, H.; Zhang, Y.; Zheng, Y.; Luo, Y.; Dai, Z.; Li, B.; Zong, Y.; Yan, Q. Fe-Doped Ni<sub>3</sub>C Nanodots in N-Doped Carbon Nanosheets for Efficient Hydrogen-

- Evolution and Oxygen-Evolution Electrocatalysis. *Angew. Chemie Int. Ed.* **2017**, *56* (41), 12566–12570. <https://doi.org/10.1002/ANIE.201706610>.
- (17) Jia, X.; Wang, M.; Liu, G.; Wang, Y.; Yang, J.; Li, J. Mixed-Metal MOF-Derived Co-Doped Ni<sub>3</sub>C/Ni NPs Embedded in Carbon Matrix as an Efficient Electrocatalyst for Oxygen Evolution Reaction. *Int. J. Hydrogen Energy* **2019**, *44* (45), 24572–24579. <https://doi.org/10.1016/J.IJHYDENE.2019.07.144>.
- (18) Cui, Z.; Li, Y.; Fu, G.; Li, X.; Goodenough, J. B.; Cui, Z.; Li, Y.; Fu, G.; Li, X.; Goodenough, B. Robust Fe<sub>3</sub>Mo<sub>3</sub>C Supported IrMn Clusters as Highly Efficient Bifunctional Air Electrode for Metal–Air Battery. *Adv. Mater.* **2017**, *29* (40), 1702385. <https://doi.org/10.1002/ADMA.201702385>.
- (19) Yang, J.; Wang, X.; Li, B.; Ma, L.; Shi, L.; Xiong, Y.; Xu, H. Novel Iron/Cobalt-Containing Polypyrrole Hydrogel-Derived Trifunctional Electrocatalyst for Self-Powered Overall Water Splitting. *Adv. Funct. Mater.* **2017**, *27* (17), 1606497. <https://doi.org/10.1002/adfm.201606497>.
